# Supplementary material for: A smart sensing Zn(ii) coordination polymer based on a new viologen ligand exhibiting photochromic and thermochromic and multiple solid detection properties
Source: Royal Society of Chemistry journal article supplement (doi:10.1039/d1nj03141d), 2021-01-01
Supplement: d1nj03141d1.pdf [file d1nj03141d1.pdf]

## Supporting information

### A smart sensing Zn ( II ) coordination polymer based on a new viologen ligand exhibiting photochromic and thermochromic and multiple solid detection properties

Heyi Zhang, Fangyuan He, Xiaonan Li, Zhihui Wang and Hong Zhang \*

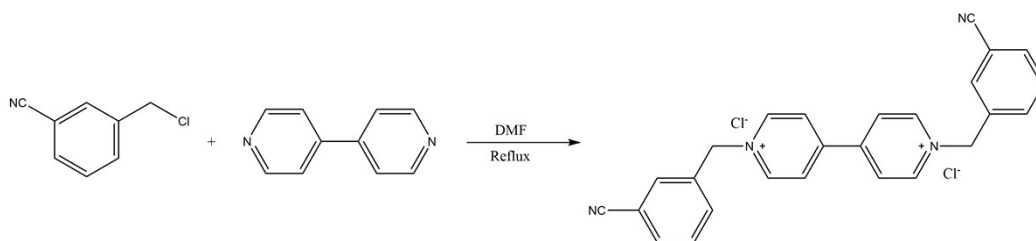

**Scheme 1** Synthesis of viologen ligand 1,1'-bis(3-cyanobenzyl)-[4,4'-bipyridine] dichloride.

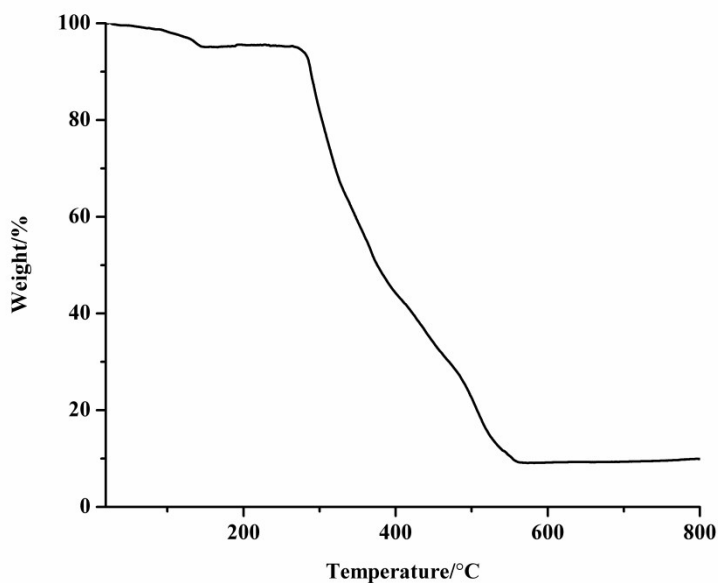

**Figure S1** The TGA data of the compound 1.

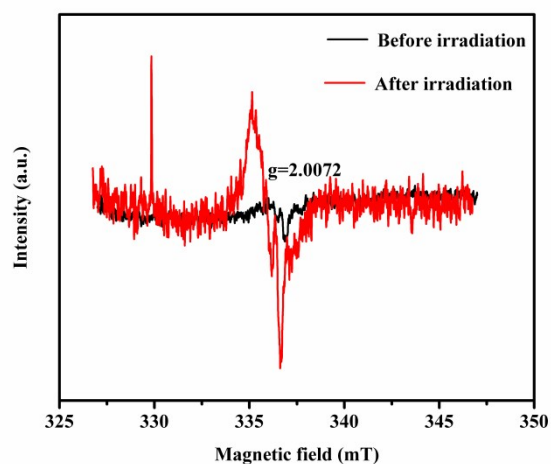

**Figure S2** EPR spectral changes of the compound 1 before and after irradiation with Xe lamp.

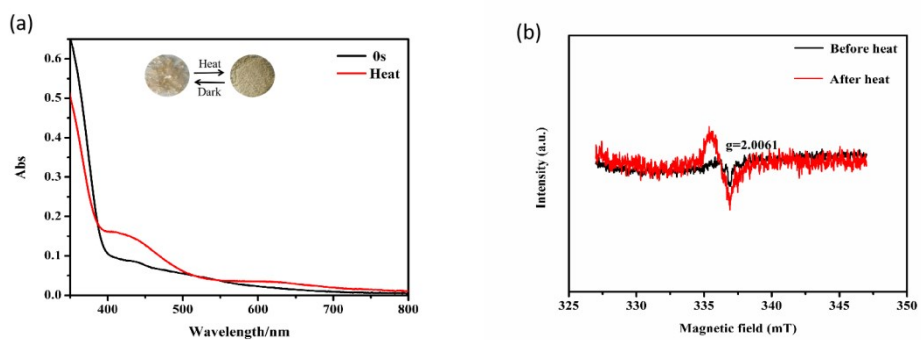

**Figure S3** (a) Uv-vis diffuse-reflectance spectral changes of compound 1 by heat at about 98 °C for 6min; (b) EPR spectral changes of compound 1 by heat at about 98 °C for 6min.

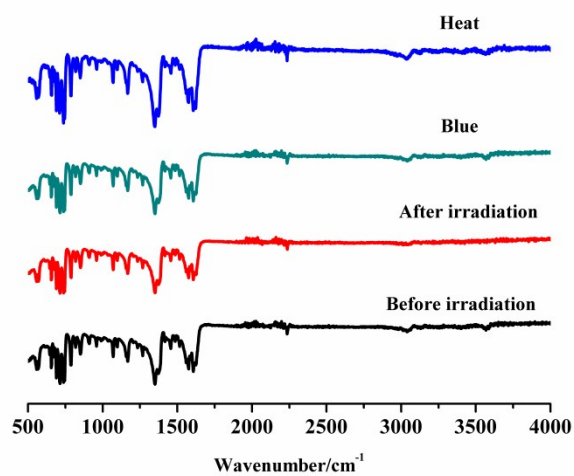

**Figure S4** FTIR spectra of compound 1 before irradiation (black), after irradiation (red), blue ray (green) and heat (blue).

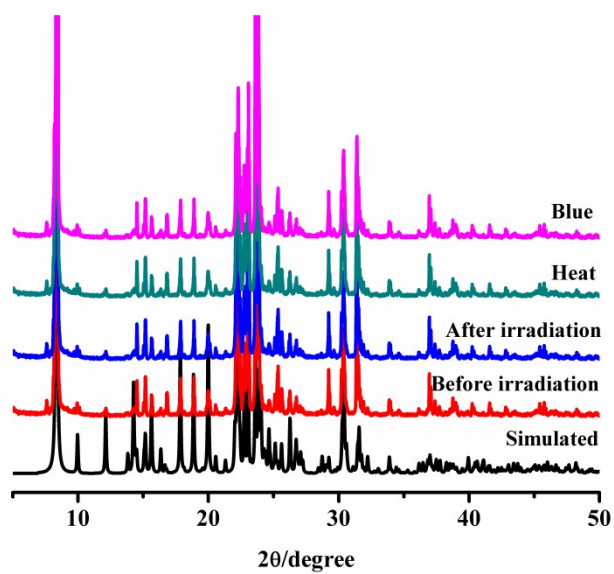

**Figure S5** Powder XRD patterns of compound 1 before irradiation (red), after irradiation (blue), heat (green), blue ray (pink). The black line is simulated curve.

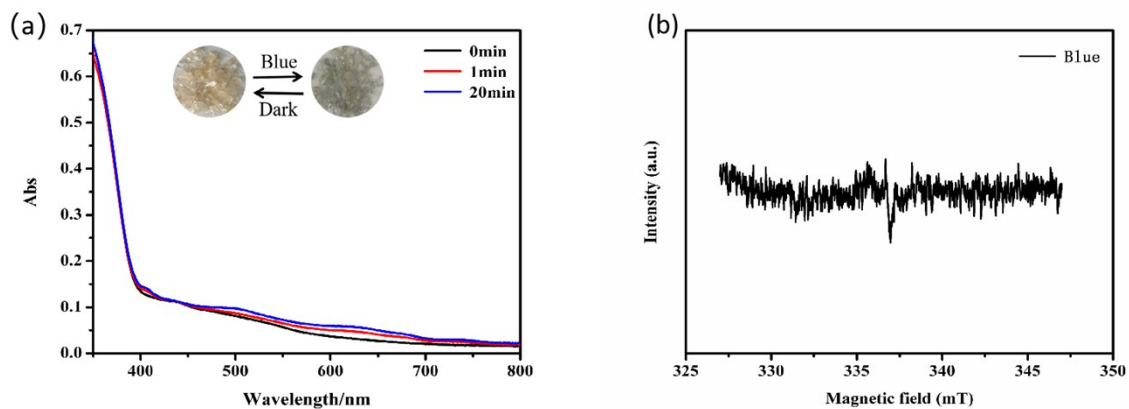

**Figure S6** (a) UV-vis spectra and photographs of compound 1 before and after irradiation with blue ray; (b) EPR spectral changes of the compound 1 before and after irradiation with blue ray.

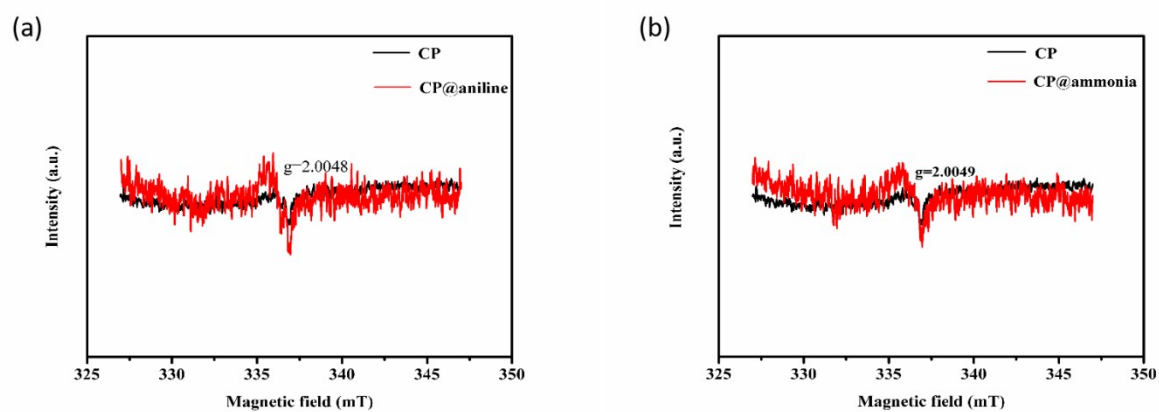

**Figure S7** (a) EPR spectral changes of CP@aniline; (b) EPR spectral changes of CP@ ammonia.

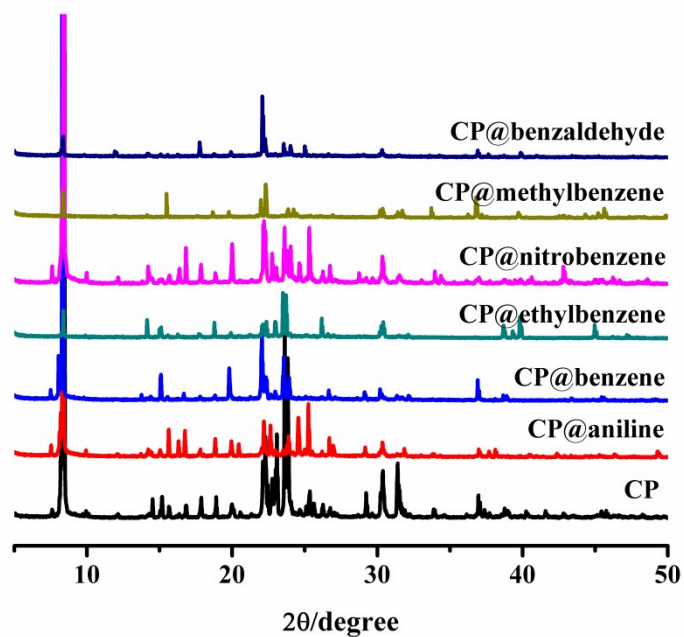

Figure S8 PXRD patterns of CP@ different benzenes. The black line is simulated curve.

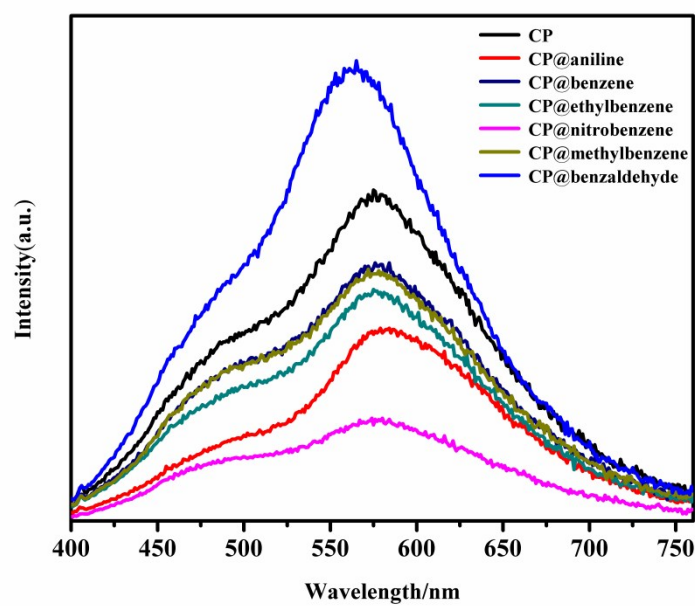

Figure S9 The luminescence emission spectral changes ( $\lambda_{ex} = 380$  nm), when detected different benzenes in solid state.

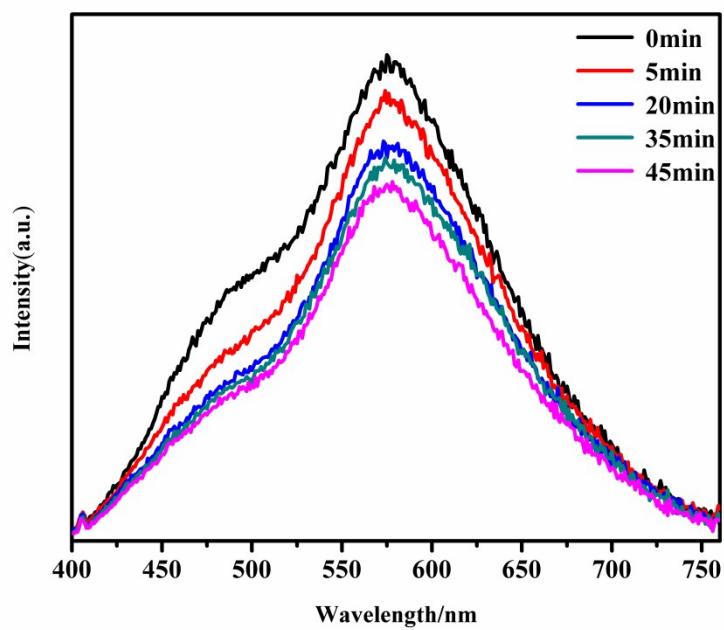

**Figure S10** The blue ray luminescence emission spectrum changes of compound 1.

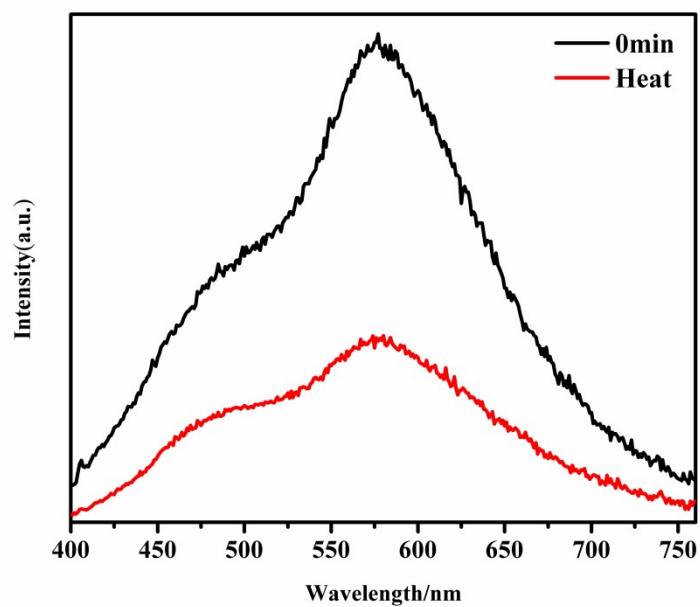

**Figure S11** The thermally controlled luminescence emission spectra of the compound 1 heated at about 98°C for 6 min.

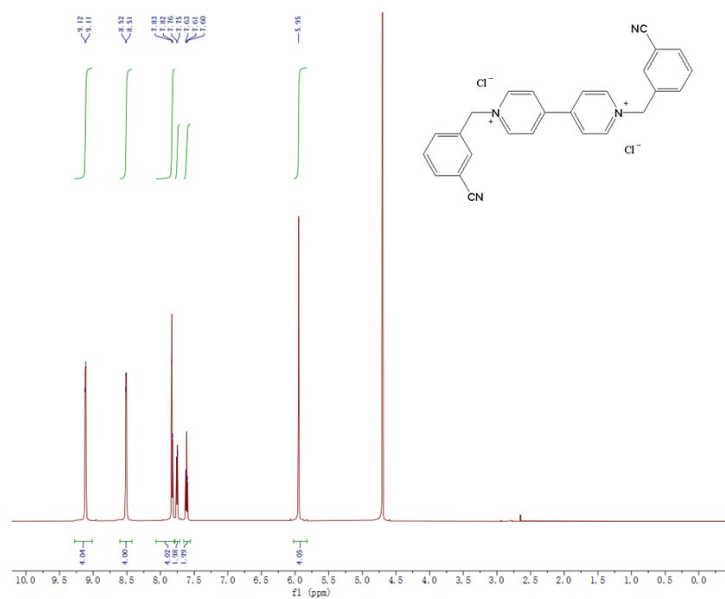

**Figure S12** The <sup>1</sup>H NMR spectrum of 1,1'-bis(3-cyanobenzyl)-[4,4'-bipyridine] dichloride ligand in D<sub>2</sub>O (600 MHz).

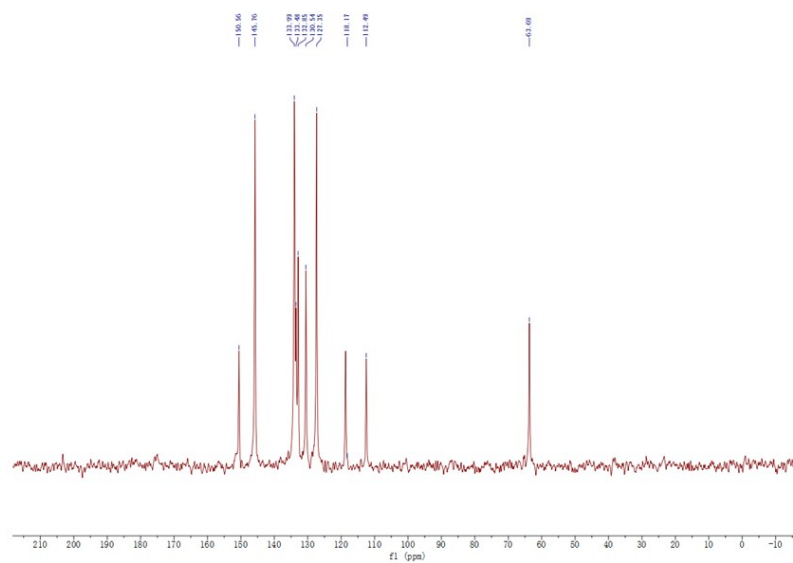

**Figure S13** The <sup>13</sup>C-NMR spectrum of 1,1'-bis(3-cyanobenzyl)-[4,4'-bipyridine] dichloride ligand in D<sub>2</sub>O (151MHz).

**Table S1.** Crystal Data of the compound 1.

|                                    |                                                                   |
|------------------------------------|-------------------------------------------------------------------|
| Identification code                | 1                                                                 |
| Empirical formula                  | C <sub>42</sub> H <sub>32</sub> N <sub>4</sub> O <sub>10</sub> Zn |
| Formula weight                     | 818.08                                                            |
| Temperature/K                      | 297.2                                                             |
| Crystal system                     | monoclinic                                                        |
| Space group                        | C2/c                                                              |
| a/Å                                | 21.270(2)                                                         |
| b/Å                                | 12.2947(12)                                                       |
| c/Å                                | 14.7085(12)                                                       |
| α/°                                | 90                                                                |
| β/°                                | 97.489(3)                                                         |
| γ/°                                | 90                                                                |
| Volume/Å <sup>3</sup>              | 3813.5(6)                                                         |
| Z                                  | 4                                                                 |
| ρ <sub>calc</sub> /cm <sup>3</sup> | 1.425                                                             |
| μ/mm <sup>-1</sup>                 | 0.710                                                             |
| F(000)                             | 1688.0                                                            |
| Crystal size/mm <sup>3</sup>       | 0.3 × 0.26 × 0.25                                                 |
| Radiation                          | MoKα (λ = 0.71073)                                                |
| 2θ range for data collection/°     | 4.89 to 52.19                                                     |
| Index ranges                       | -26 ≤ h ≤ 26, -15 ≤ k ≤ 15, -18 ≤ l ≤ 16                          |
| Reflections collected              | 27119                                                             |
| Independent reflections            | 3775 [R <sub>int</sub> = 0.0618, R <sub>sigma</sub> = 0.0342]     |
| Data/restraints/parameters         | 3775/4/266                                                        |
| Goodness-of-fit on F <sup>2</sup>  | 1.053                                                             |
| Final R indexes [I ≥ 2σ (I)]       | R <sub>1</sub> = 0.0376, wR <sub>2</sub> = 0.0863                 |
| Final R indexes [all data]         | R <sub>1</sub> = 0.0541, wR <sub>2</sub> = 0.0938                 |



**Table S2.** Selected bond length (Å) and angle (°) of the compound 1.

| Bonds                                | Dist. (Å)  |
|--------------------------------------|------------|
| Zn1-O4 <sup>1</sup>                  | 1.9434(15) |
| Zn1-O4 <sup>2</sup>                  | 1.9434(15) |
| Zn1-O1                               | 1.9431(16) |
| Zn1-O1 <sup>3</sup>                  | 1.9431(16) |
| Angle                                | (°)        |
| O4 <sup>1</sup> -Zn1-O4 <sup>2</sup> | 121.17(10) |
| O1 <sup>3</sup> -Zn1-O4 <sup>2</sup> | 92.89(7)   |
| O1-Zn1-O4 <sup>1</sup>               | 92.89(7)   |
| O1 <sup>3</sup> -Zn1-O4 <sup>1</sup> | 116.71(8)  |
| O1-Zn1-O4 <sup>2</sup>               | 116.71(8)  |
| O1-Zn1-O1 <sup>3</sup>               | 118.81(11) |
